# Supplementary material
Source: PubMed Central journal article supplement (PMC2154410)
Supplement: supp_0707138105_07138Appendix.pdf [file supp_0707138105_07138Appendix.pdf]

## Linkage Score for Cox Partial Likelihood

For linkage, the first derivative of the efficient score for the partial likelihood (8) vanishes, and the second derivative produces

$$\begin{aligned}\ddot{\ell}(\beta_0; v_t | Y) &= \sum_{i=1}^n \sum_{j=1}^n \mathbb{E}_0[\kappa_{ij} | Y] \{ \mathbb{E}_0[U_i U_j | v_t] - \mathbb{E}_0[U_i U_j] \} \\ &= \sum_{i=1}^n \sum_{j=1}^n \mathbb{E}_0[\kappa_{ij} | Y] \{ (\hat{\Phi}_{ij} - \Phi_{ij}) \sigma_{A:U}^2 + (\hat{\Delta}_{ij} - \Delta_{ij}) \sigma_{D:U}^2 \},\end{aligned}$$

where

$$\begin{aligned}\kappa_{ij} &= \sum_{k=1}^n \hat{p}_{ki} \hat{p}_{kj} \delta_k 1_{\{i \in \mathcal{R}_k\}} 1_{\{j \in \mathcal{R}_k\}} + \delta_i \delta_j + \sum_{k=1}^n \sum_{l=1}^n \hat{p}_{ki} \hat{p}_{lj} \delta_k \delta_l 1_{\{i \in \mathcal{R}_k\}} 1_{\{j \in \mathcal{R}_l\}} \\ &\quad - \sum_{l=1}^n \delta_i \delta_l 1_{\{j \in \mathcal{R}_l\}} \hat{p}_{lj} - \sum_{k=1}^n \delta_j \delta_k 1_{\{i \in \mathcal{R}_k\}} \hat{p}_{ki}.\end{aligned}$$

## Normal Distribution

We give here some technical details of the example involving the normal distribution. Under the assumption that the random effects  $G$  and  $E$  have normal distributions with mean 0 and covariance  $\Sigma_G$  and  $\Sigma_E$ , respectively,  $\eta$  and  $Y$  have a multivariate normal distribution with mean  $\mu = z\beta_z$  and covariance matrix:

$$\begin{pmatrix} \Sigma & R \\ R & R \end{pmatrix},$$

where  $R = \Sigma_G + \Sigma_E$  and  $\Sigma = R + \sigma_e^2 I$ .

The conditional distribution of  $\epsilon$  given  $Y$  has mean

$$\frac{1}{\sigma_e^2} \left\{ Y - [\mu + R\Sigma^{-1}(Y - \mu)] \right\} = \frac{1}{\sigma_e^2} [I - R\Sigma^{-1}](Y - \mu) = \Sigma^{-1}(Y - \mu),$$

and the statistic can be written as

$$\dot{\ell}(\beta_0; U | Y) = (Y - \mu)' \Sigma^{-1} (U - \mathbb{E}_0 U).$$

When  $Y$  is measured in pedigrees, the polygenic random effect  $G$  is often assumed to have covariance structure  $\Sigma_G = \sigma_G^2 \Phi$ , where  $\Phi$  is the coefficient of relationship matrix. For simplicity, we set  $\beta_E = 0$  in what follows to correspond to a standard genetic variance component model, so  $\Sigma = \sigma_G^2 \Phi + \sigma_e^2 I$ . The statistic to test for association in this context is

$$\dot{\ell}(\beta_0; U | Y) = (Y - \mu)' (\sigma_G^2 \Phi + \sigma_e^2 I)^{-1} (U - \mathbb{E}_0 U).$$

When the observations are from a collection of pedigrees, under the assumption of independence of  $G$  and  $U$ ,  $\Phi$  is a block diagonal matrix and the preceding expression reduces to a sum of terms of the indicated form, where each term corresponds to a pedigree.

In the context of linkage analysis, we can write the efficient score as

$$\begin{aligned} \ddot{\ell}(\beta_0; v_t | Y) &= \sum_{i=1}^n \sum_{j=1}^n \mathbb{E}_0[\epsilon_i \epsilon_j | Y] \{ \mathbb{E}_0[U_i U_j | v_t] - \mathbb{E}_0[U_i U_j] \} \\ &= \sum_{i=1}^n \sum_{j=1}^n \mathbb{E}_0[\epsilon_i \epsilon_j | Y] [(\hat{\Phi}_{ij} - \Phi_{ij}) \sigma_{A:U}^2 + (\hat{\Delta}_{ij} - \Delta_{ij}) \sigma_{D:U}^2]. \end{aligned}$$

We can rewrite this as

$$\text{tr} \left\{ \mathbb{E}_0 \left[ \left( \frac{Y - \eta}{\sigma_e^2} \right) \left( \frac{Y - \eta}{\sigma_e^2} \right)' \middle| Y \right] [(\hat{\Phi} - \Phi) \sigma_{A:U}^2 + (\hat{\Delta} - \Delta) \sigma_{D:U}^2] \right\}.$$

Let  $\hat{\mu}$  be the conditional expectation of  $\eta$  given  $Y$ , then

$$\begin{aligned}
\mathbb{E}_0 \left[ \left( \frac{Y - \eta}{\sigma_e^2} \right) \left( \frac{Y - \eta}{\sigma_e^2} \right)' \mid Y \right] &= \mathbb{E}_0 \left[ \left( \frac{Y - \hat{\mu} + \hat{\mu} - \eta}{\sigma_e^2} \right) \left( \frac{Y - \hat{\mu} + \hat{\mu} - \eta}{\sigma_e^2} \right)' \mid Y \right] \\
&= \left( \frac{Y - \hat{\mu}}{\sigma_e^2} \right) \left( \frac{Y - \hat{\mu}}{\sigma_e^2} \right)' + \sigma_e^{-4} \text{Var}(\eta \mid Y) \\
&= [\Sigma^{-1}(Y - \mu)] [\Sigma^{-1}(Y - \mu)]' + \sigma_e^{-2} \Sigma^{-1} R
\end{aligned}$$

so, after putting  $\hat{\Sigma} = (Y - \mu)(Y - \mu)'$ , the score statistic reduces to

$$\begin{aligned}
\ddot{\ell}(\beta_0; v_t \mid Y) &= \\
&\text{tr} \left\{ [\Sigma^{-1} \hat{\Sigma} \Sigma^{-1} + \sigma_e^{-2} \Sigma^{-1} R] [(\hat{\Phi} - \Phi) \sigma_{\text{A:U}}^2 + (\hat{\Delta} - \Delta) \sigma_{\text{D:U}}^2] \right\} \\
&= \text{tr} \left\{ [\Sigma^{-1} \hat{\Sigma} \Sigma^{-1} + \sigma_e^{-2} \Sigma^{-1} (\Sigma - \sigma_e^2 I)] [(\hat{\Phi} - \Phi) \sigma_{\text{A:U}}^2 + (\hat{\Delta} - \Delta) \sigma_{\text{D:U}}^2] \right\} \\
&= \text{tr} \left\{ [(\Sigma^{-1} \hat{\Sigma} - I) \Sigma^{-1} + \sigma_e^{-2} I] [(\hat{\Phi} - \Phi) \sigma_{\text{A:U}}^2 + (\hat{\Delta} - \Delta) \sigma_{\text{D:U}}^2] \right\} \\
&= \text{tr} \left\{ [(\Sigma^{-1} \hat{\Sigma} - I) \Sigma^{-1}] [(\hat{\Phi} - \Phi) \sigma_{\text{A:U}}^2 + (\hat{\Delta} - \Delta) \sigma_{\text{D:U}}^2] \right\}.
\end{aligned}$$
